# Supplementary material for: A novel donor–acceptor carbazole and benzothiadiazole material for deep red and infrared emitting applications
Source: Royal Society of Chemistry journal article supplement (doi:10.1039/c5tc04183j), 2016-01-01
Supplement: c5tc04183j1.pdf [file c5tc04183j1.pdf]

# Novel donor-acceptor carbazole and benzothiadiazole material for deep red and infrared emitting applications

## SUPPLEMENTARY INFORMATION

Przemyslaw Ledwon<sup>\*a</sup>, Pawel Zassowski<sup>a</sup>, Tomasz Jarosz<sup>a</sup>, Mieczyslaw Lapkowski<sup>a,b</sup>, Pawel Wagner<sup>c</sup>, Vladyslav Cherpak<sup>d</sup>, Pavlo Stakhira<sup>d</sup>

<sup>a</sup> Silesian University of Technology, Faculty of Chemistry, 44-100 Gliwice, Strzody 9, Poland

<sup>b</sup> Centre of Polymer and Carbon Materials, Polish Academy of Sciences, 41-819 Zabrze, Curie-Skłodowskiej 34, Poland

<sup>c</sup> ARC Centre of Excellence for Electromaterials Science and the Intelligent Polymer Research Institute, University of Wollongong, Australia

<sup>d</sup> Lviv Polytechnic National University, S. Bandera 12, 79013 Lviv, Ukraine

\*Correspondence - przemyslaw.ledwon@polsl.pl

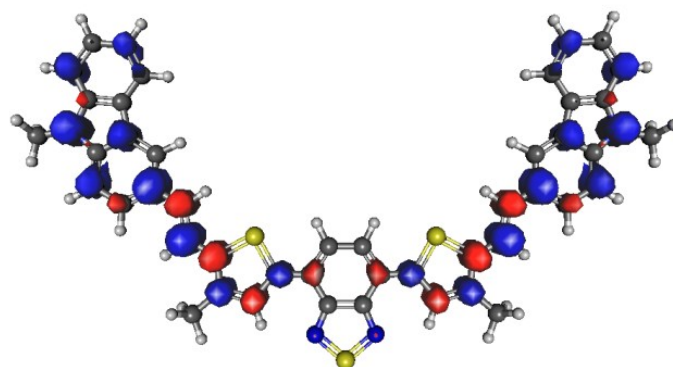

Fig. S1 - A simulated spin density (isovalue=0.002) of radical trication (charge=3, multiplicity=2), calculated with DFT/uB3LYP/6-31G(d) method

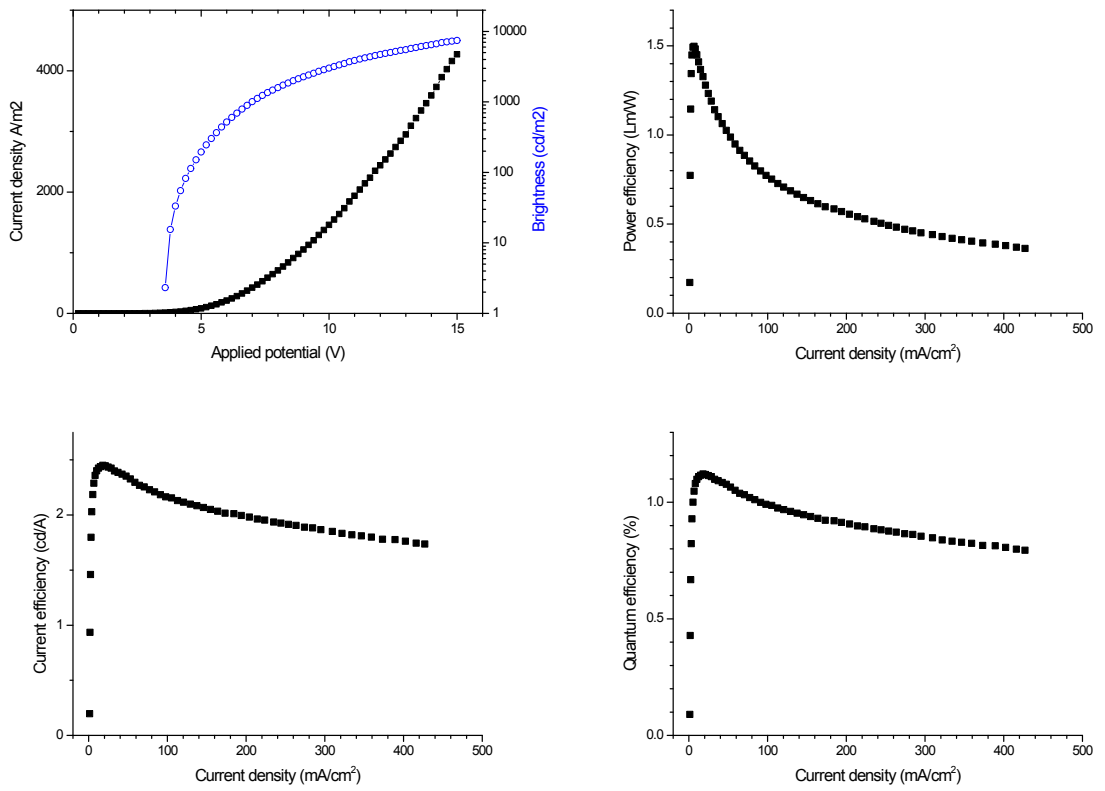

Fig. SI.2 Operating parameters of a prototype OLED based on 160nm layer of C1 (CuI/C1/BCP/Ca/Al)

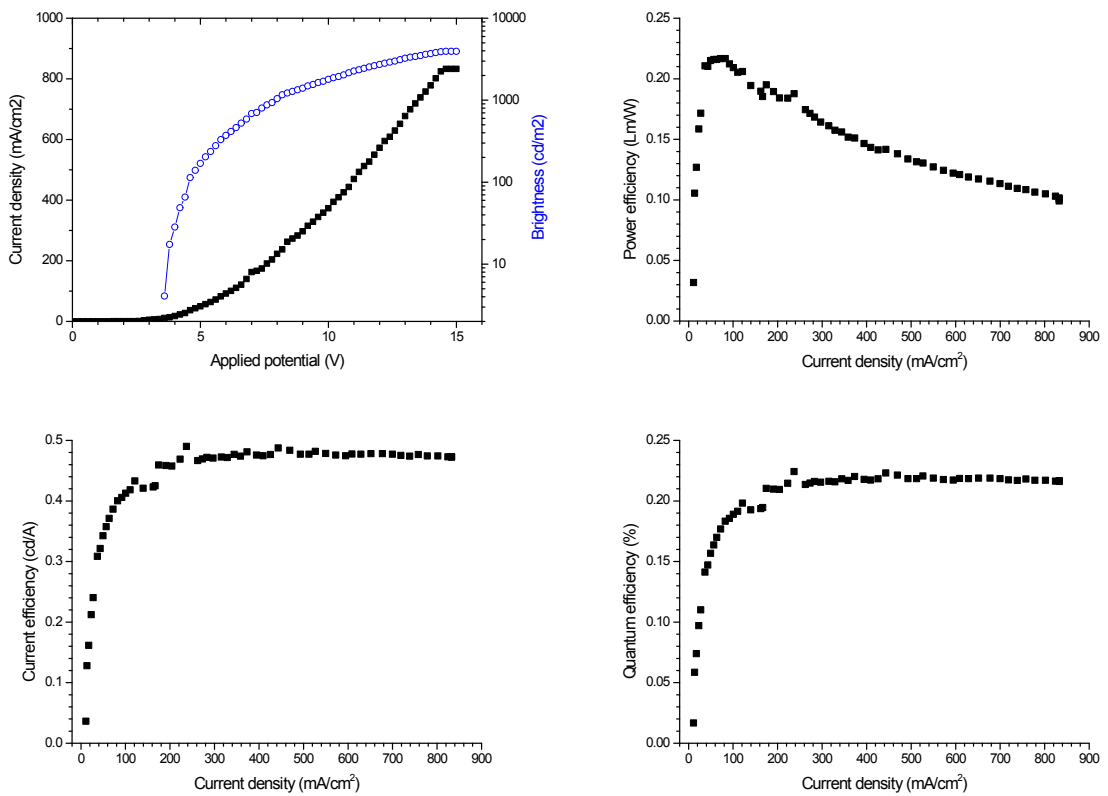

Fig. SI.3 Operating parameters of a prototype OLED based on 80 nm layer of C1 (CuI/C1/BCP/Ca/Al)
